# Supplementary material
Source: MDPI journal article supplement (https://www.mdpi.com/2221-3759/11/4/40)
Supplement: s1 [file s1]

Supplementary Data: Figure S1. Source data for Western blots

A: Source data to Figure 3E: KugelkernCS

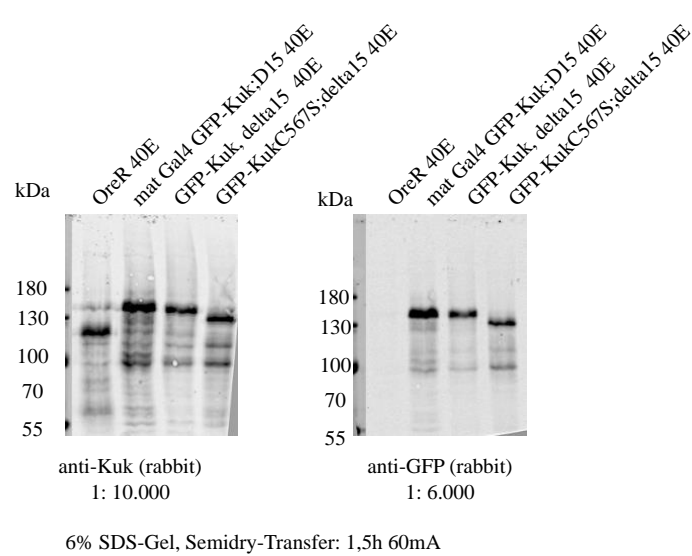

B: Source data to Figure 3F: Kugelkern and RBBP4

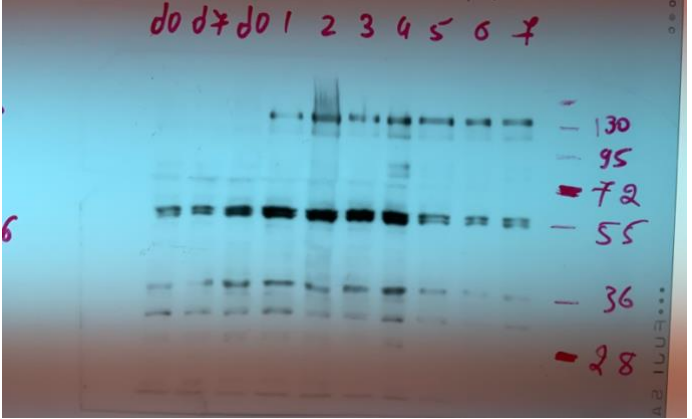

C: Source data to Figure 3F: pA414

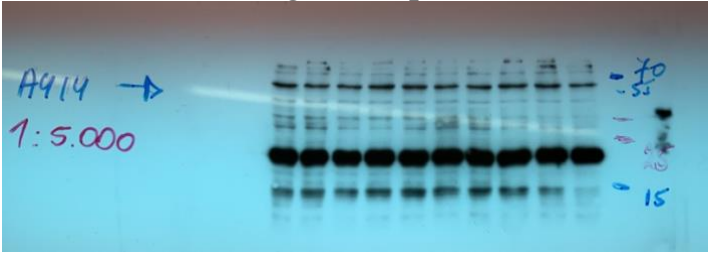

D Source data to Figure 3F: tubulin

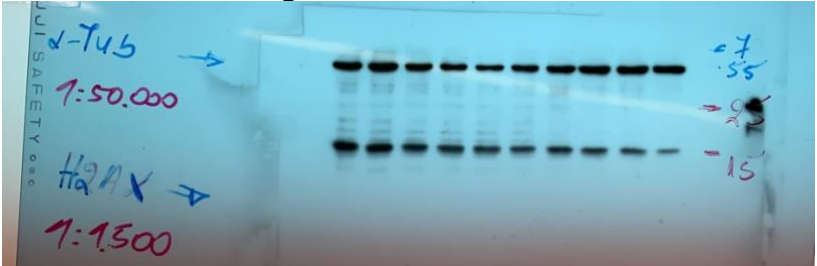

E: Source data to Figure 3G:

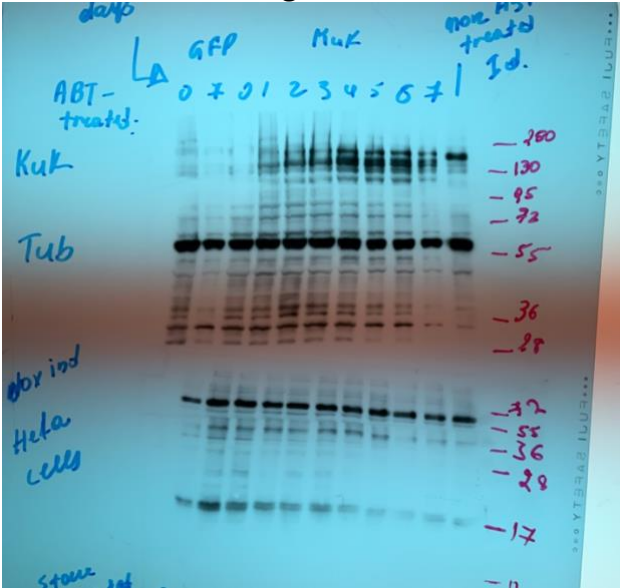

F: Source data to Figure 4B: GFP induction by RU

20170112 File: 4776

MHC-GS GAI4, UAS-GFP (10d Induction, 1,5 Thorax)

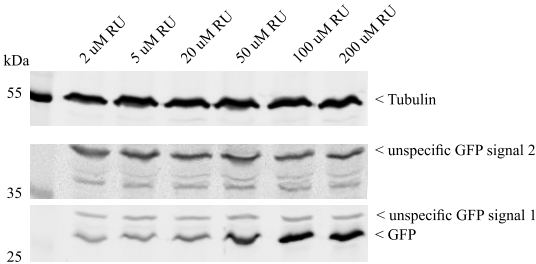

10 % SDS-Gel  
Semidry-Transfer: 60 mA 1,5h  
1st AB: anti-GFP (rabbit) (1:6.000) 2nd AB: anti-rabbit (goat, 800nm)  
1st AB: anti-Tubulin (mouse) (1:75.000) 2nd AB: anti-mouse (goat, 680nm)
